# Supplementary material for: Tyrosol Facilitates Neovascularization by Enhancing Skeletal Muscle Cells Viability and Paracrine Function in Diabetic Hindlimb Ischemia Mice
Source: PubMed Central journal article supplement (PMC6702659; doi:10.3389/fphar.2019.00909), 2019-08-14
Supplement: DataSheet_1.pdf [file DataSheet_1.pdf]

## **Supplementary Material**

### **Tyrosol facilitates neovascularization by enhancing skeletal muscle cells viability and paracrine function in diabetic hind-limb ischemia mice**

Jianqi Zhang, Dyah Ari Nugrahaningrum, Olivia Marcelina, Agnes Dwi Ariyanti,  
Guixue Wang, Caiping Liu, Shourong Wu\*, and Vivi Kasim\*

\*Email: [vivikasim@cqu.edu.cn](mailto:vivikasim@cqu.edu.cn) (V.K.)  
[shourongwu@cqu.edu.cn](mailto:shourongwu@cqu.edu.cn) (S.W.)

## Figure S1

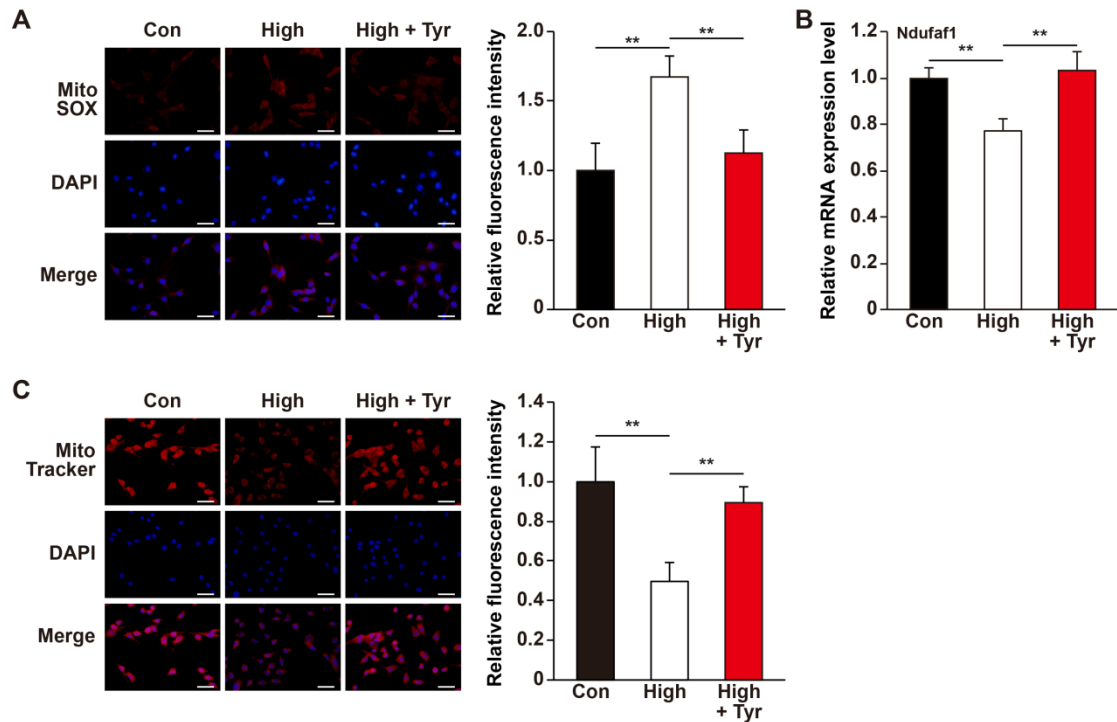

**FIGURE S1** | The effect of tyrosol on C2C12 cells mitochondrial oxidative damage. **(A)** Mitochondrial reactive oxygen species (ROS) level in C2C12 cells cultured under hyperglycemia, as examined using MitoSOX staining; left: representative images (scale bars: 100  $\mu$ m), right: relative fluorescence intensity quantification (n = 6). **(B)** mRNA expression level of Ndufaf1 in C2C12 cells cultured under hyperglycemia, as determined using quantitative reverse transcription PCR (qPCR; n = 3).  $\beta$ -Actin was used for normalization. **(C)** The level of mitochondrial membrane potential of C2C12 cells cultured under hyperglycemia, as examined with MitoTracker Red CMXRos staining; left: representative images (scale bars: 100  $\mu$ m), right: relative fluorescence intensity quantification (n = 6). Data were shown as relative to that of control, and expressed as mean  $\pm$  S.D. **\*\*** $P < 0.01$ .

## Figure S2

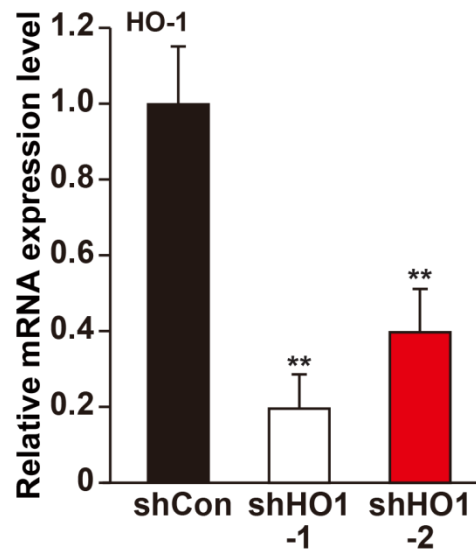

**FIGURE S2** | The mRNA expression level of HO-1 in C2C12 cells transfected with shHO-1. HO-1 mRNA expression levels of C2C12 cells transfected with indicated shRNA expression vectors, as determined using quantitative reverse-transcription PCR.  $\beta$ -Actin was used for normalization. Data were shown as relative to that of control, and expressed as mean  $\pm$ S.D. (n = 3).  $^{***}P < 0.01$ .

## Figure S3

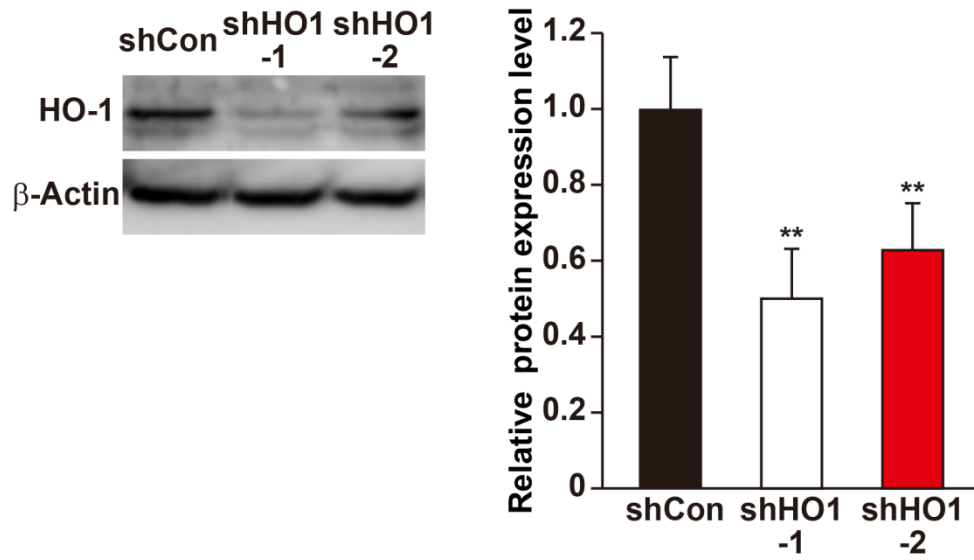

**FIGURE S3** | The protein expression level of HO-1 in C2C12 cells transfected with shHO-1. HO-1 protein expression level in C2C12 cells transfected with indicated shRNA expression vectors, as determined using western blotting: representative images (left) and quantification results (right,  $n = 3$ ) were shown.  $\beta$ -Actin was used as a loading control. Quantification data were shown as relative to that of control, and expressed as mean  $\pm$  S.D. \*\* $P < 0.01$ .

## Figure S4

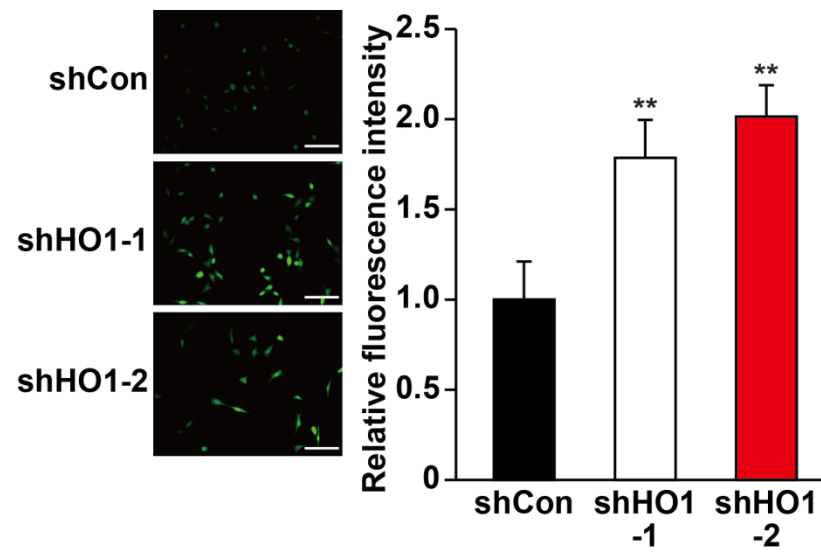

**FIGURE S4** | The effect of knocking down *HO-1* on C2C12 cells intracellular ROS level. Intracellular ROS level in *HO-1*-silenced C2C12 cells, as determined using DCFH-DA: representative images (left, scale bars: 200  $\mu\text{m}$ ); and quantification of relative fluorescence intensity (right,  $n = 6$ ) are shown. Data were shown as relative to that of control, and expressed as mean  $\pm$  S.D. **\*\* $P < 0.01$** .

**Figure S5**

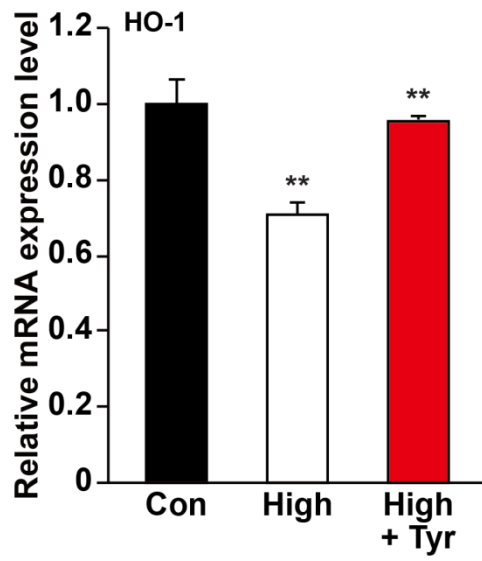

**FIGURE S5** | The effect of tyrosol on HO-1 expression level in C2C12 cells cultured under hyperglycemia. The mRNA expression level of HO-1 in C2C12 cells treated with tyrosol, as determined using qPCR.  $\beta$ -Actin was used for normalization. Data were shown as relative to that of control, and expressed as mean  $\pm$  S.D. (n = 3). \*\* $P < 0.01$ .

**TABLE S1** | Antibodies and chemicals used for western blotting, immunofluorescence, and phalloidin staining.

| Antibody                                           | Product No. | Maker                    | Experiment          | Dilution |
|----------------------------------------------------|-------------|--------------------------|---------------------|----------|
| anti-VEGF-A                                        | sc-152      | Santa Cruz Biotechnology | Western Blotting    | 1/300    |
| anti-HO-1                                          | sc-10789    | Santa Cruz Biotechnology | Western Blotting    | 1/500    |
| anti-PDGF-BB                                       | sc-7878     | Santa Cruz Biotechnology | Western Blotting    | 1/300    |
| anti- $\beta$ -Actin                               | 60008-1-Ig  | Proteintech              | Western blotting    | 1/20000  |
| anti-PECAM-1                                       | 550274      | BD Pharmingen            | Immunofluorescence  | 1/100    |
| Monoclonal anti-murine $\alpha$ -SMA Cy3 conjugate | C6198       | Sigma-Aldrich            | Immunofluorescence  | 1/50     |
| Alexa Fluor 488 Goat Anti-Rat IgG                  | A11006      | Invitrogen               | Immunofluorescence  | 1/100    |
| Goat Anti-Mouse IgG                                | ZB2305      | ZSGB-BIO                 | Western Blotting    | 1/10000  |
| Goat Anti-Rabbit IgG                               | ZB2301      | ZSGB-BIO                 | Western Blotting    | 1/10000  |
| Alexa Fluor 555 Phalloidin                         | A34055      | Invitrogen               | Phalloidin staining | 1/250    |

**TABLE S2** | Blood glucose concentration in diabetic hind-limb ischemia model mice during the experiment.

| Control (mmol/l) |             |                               |                          | Tyrosol (mmol/l) |             |                               |                          |
|------------------|-------------|-------------------------------|--------------------------|------------------|-------------|-------------------------------|--------------------------|
| No               | 3w HFD      | 1w after STZ (1d pre-surgery) | 3w post-surgery          | No               | 3w HFD      | 1w after STZ (1d pre-surgery) | 3w post-surgery          |
| 1                | 8.9         | 21.6                          | 20.1                     | 1                | 9.7         | 20.7                          | 18.7                     |
| 2                | 6.3         | 18.9                          | 18.5                     | 2                | 7.9         | 20.9                          | 20.3                     |
| 3                | 8.8         | 20.3                          | 19.2                     | 3                | 7.4         | 20.2                          | 17.3                     |
| 4                | 8.6         | 21.9                          | 20.6                     | 4                | 6.9         | 22.8                          | 21.5                     |
| 5                | 6.9         | 24.8                          | 24                       | 5                | 8.2         | 25.7                          | 24.8                     |
| <b>Mean</b>      | <b>7.9</b>  | <b>21.5</b>                   | <b>20.48</b>             | <b>Mean</b>      | <b>8.02</b> | <b>22.06</b>                  | <b>20.52</b>             |
| <b>Stdev</b>     | <b>1.21</b> | <b>2.19</b>                   | <b>2.13</b>              | <b>Stdev</b>     | <b>1.06</b> | <b>2.26</b>                   | <b>2.87</b>              |
| <b>P value</b>   |             | <b>1.97E-6<sup>#</sup></b>    | <b>0.477<sup>§</sup></b> | <b>P value</b>   |             | <b>3.83E-08<sup>#</sup></b>   | <b>0.374<sup>§</sup></b> |

HFD: high fat diet; STZ: streptozotocin administration.

<sup>#</sup>P value was calculated versus 3 w HFD using one-way ANOVA.

<sup>§</sup>P value was calculated versus 1 w after STZ using one-way ANOVA.
